# Supplementary material
Source: PubMed Central journal article supplement (PMC3932902)
Supplement: 1307525111_pnas.201307525SI.pdf [file 1307525111_pnas.201307525SI.pdf]

# Supporting Information

Gonzalez et al. 10.1073/pnas.1307525111

## SI Materials and Methods

**Yeast Growth Media.** Standard synthetic media were used: yeast extract-peptone-dextrose (YPD) contained 2% (wt/vol) glucose and complete synthetic media contained 0.6% casamino acids and/or individual amino acid supplements.

**Ubiquitination Assays.** In all experiments, cells were treated with 1% formaldehyde for 2 min to trap ubiquitinated intermediates. Cross-linking was quenched, and extracts were made in immunoprecipitation buffer (50 mM Tris·HCl, pH 8.0, 150 mM NaCl, 5 mM EDTA, 1% Triton-X 100, 1 mM DTT, and protease inhibitor mixture II; Calbiochem). Extracts (100 µg) were precleared with protein G magnetic beads (Qiagen) for 1 h at room temperature. Anti-HA (10 µg; Santa Cruz Biotechnology) was added, and samples were incubated at 4 °C overnight. Fifty microliters of protein G magnetic beads was added, and samples were incubated on ice for 2 h. Immobilized proteins were washed three times in immunoprecipitation buffer and eluted, and cross-links were reversed in SDS sample buffer. Proteins were separated by SDS/PAGE, transferred to membranes, and probed with rabbit anti-ubiquitin (donated by S. Reed, Cardiff University, Cardiff, UK) or anti-HA antibody.

**LC and MS.** Tap-purified proteins were reduced with 6.5 mM DTT in 50 mM ammonium bicarbonate, alkylated with 54 mM iodoacetamide in 50 mM ammonium bicarbonate, and digested with trypsin (Promega). Combined digests of <sup>14</sup>N- and <sup>15</sup>N-labeled samples were subjected to strong cation exchange (SCX) chromatography followed by automated on-line sandwich reverse phase (RP)-TiO<sub>2</sub>-RP LC-MS/MS to enrich for phosphopeptides as described elsewhere (1). Briefly, collected fractions were analyzed by

nanoflow LC using an Agilent 1100 HPLC system (Agilent Technologies) coupled on-line to a LTQ-Orbitrap mass spectrometer (ThermoFisher Scientific). Phosphopeptides were trapped and enriched on three separate precolumns [two 3-cm × 100-µm inner diameter Aqua C<sub>18</sub> (Phenomenex) and a 5-cm × 100-µm inner diameter TiO<sub>2</sub> (GL Sciences), all packed in house] and separated on a 20-cm analytical column [ReproSil-Pur C<sub>18</sub>-AQ 3-µm; (Dr. Maisch GmbH), 50-µm inner diameter, packed in house] at ~100 nL/min in a 60-min gradient from 10% to 40% solvent [0.1 M acetic and 0.13 M formic acid in 8:2 (vol/vol) acetonitrile/water]. The eluent was sprayed via standard coated emitter tips (New Objective) into an LTQ-Orbitrap, which was operated in data-dependent mode, automatically switching between MS, MS/MS, and neutral loss driven MS<sup>3</sup>. Full-scan MS spectra (*m/z* 400–1,500) were acquired with a resolution of 60,000 (at *m/z* 400), and the two most intense ions were selected for MS/MS fragmentation in the linear ion trap. Raw data were converted to DTA files using Bioworks 3.2 and merged into Mascot Generic Format files, which were searched against the *Saccharomyces Genome Database* (SGD) using Mascot (version 2.2) as a search engine. Carbamidomethylation of cysteine was set as fixed modification; methionine oxidation and serine, threonine, and tyrosine phosphorylation were set as variable modifications, selecting <sup>15</sup>N labeling as quantification mode. The mass tolerance of the precursor ion was 10 ppm and 0.9 Da for fragment ions. The false discovery rate was set at <1% (Mascot score threshold of 35) using the decoy database approach. MSQuant (2) was used for peptide quantification; localization of phosphorylation sites was determined in Mascot version 2.4.

1. Lemeer S, et al. (2008) Comparative phosphoproteomics of zebrafish Fyn/Yes morpholino knockdown embryos. *Mol Cell Proteomics* 7(11):2176–2187.

2. Gouw JW, Krijgsveld J (2012) MSQuant: A platform for stable isotope-based quantitative proteomics. *Methods Mol Biol* 893:511–522.

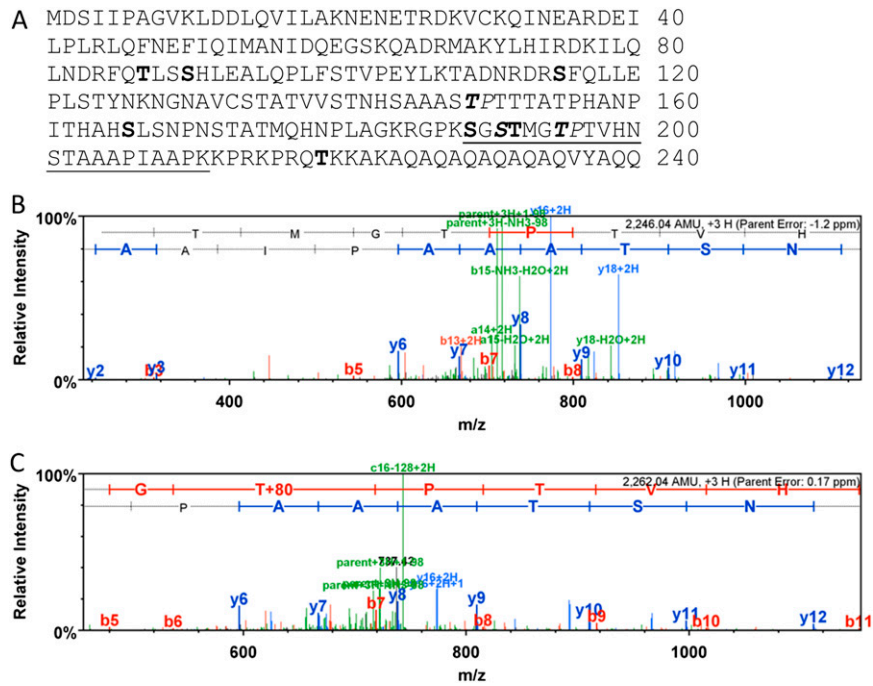

**Fig. S1.** NetPhos prediction and mass spectra for Med3phosphorylation sites. (A) Predicted Cdk8 phosphorylation sites in Med3. The predicted peptide sequence of Med3 $\Delta$ Sal1 (amino acids 1–234) was analyzed using Netphos 2 (1). All predicted serine and threonine phosphorylation sites with significant Netphos scores are shown (S/T, bold). The single Med3 phospho-peptide detected by tandem mass spectrometry (MS/MS) (underlined) contains one of the two predicted Cdk8 phosphorylation sites (T195P, italicized), and a second phosphorylation site (S191, italicized) detected by LC-MS/MS are shown. (B) MS/MS spectrum of SGSTMGT(phos)PTVHNSTAAPIAAPK. (C) MS/MS spectrum of SGS(phos)TMGTPTVHNSTAAPIAAPK.

1. Blom N, Gammeltoft S, Brunak S (1999) Sequence and structure-based prediction of eukaryotic protein phosphorylation sites. *J Mol Biol* 294(5):1351–1362.

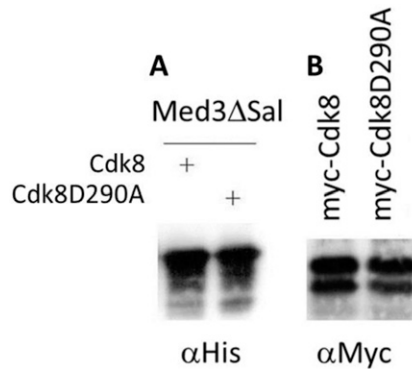

**Fig. S2.** In vitro phosphorylation of Med3 by purified Cdk8. (A) Med3 $\Delta$ Sal input protein detected using anti-histidine tag antibody. (B) myc-epitope tagged Cdk8 purified from yeast cells grown by immunoprecipitation using anti-myc antibody.

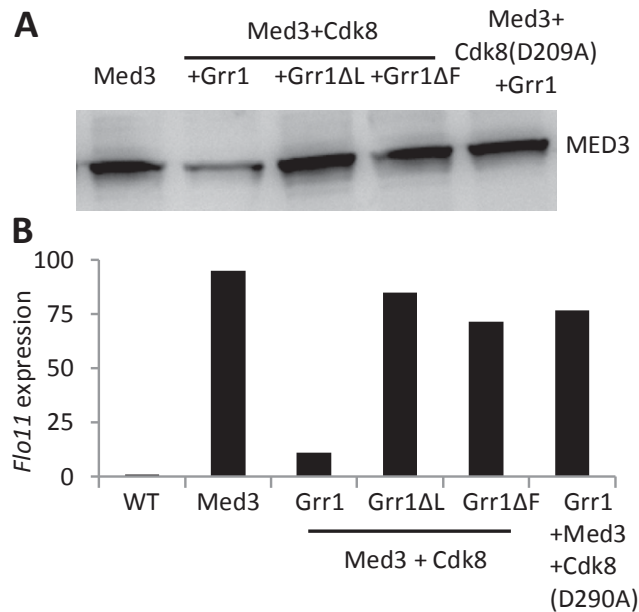

**Fig. S3.** Interaction of Med3 and Grr1 regulates *FLO11* expression. (A) Stability of ectopically expressed Med3 is decreased by Grr1 and Cdk8. HA-Med3 was immunoprecipitated from cells expressing MED3, GRR1, and nonfunctional Grr1ΔL or Grr1ΔF derivatives, together with CDK8 (GIG-2) or the kinase inactive variant (*cdk8*D290A, GIG-3). Following separation and blotting, membranes were probed with anti-HA antibody. (B) Cells were transformed with *MED3*, *CDK8*, or *cdk8* (D290A) and *GRR1* (where indicated). Total RNA was isolated and *FLO11* expression levels determined using quantitative RT-PCR analysis. Flo11 relative starting quantities were normalized to *ACT1* and values are given as percentage relative to WT.

**Table S1. Med3 interacts with Cdk8 in vivo**

|                 | Med3 | Med3ΔSal | Ssn6 | pACT2 |
|-----------------|------|----------|------|-------|
| Fold activation | 5.2  | 2.7      | 2.8  | 1     |

In vivo interaction between full-length and the N-terminal region of Med3 (Med3ΔSal) and Cdk8. Yeast was transformed with LexA-Cdk8 as bait, the indicated prey plasmids, and a LacZ reporter gene (JK103), and β-galactosidase levels were determined for at least five independent transformants. Ssn6 is a positive control. Fold increase in reporter gene activation over negative control (pACT2) is given.

**Table S2. List of genes that change at least 1.7-fold in any single deletion mutant *grr1Δ***

| Systematic name | Standard name | Name                                                  |
|-----------------|---------------|-------------------------------------------------------|
| Block I         |               |                                                       |
| YBL078C         | ATG8          | Autophagy related                                     |
| YBR072W         | HSP26         | Heat shock protein                                    |
| YBR169C         | SSE2          |                                                       |
| YBR285W         |               |                                                       |
| YER035W         | EDC2          | Enhancer of mRNA decapping                            |
| YER053C         | PIC2          | PI carrier                                            |
| YHR138C         |               |                                                       |
| YIL107C         | PFK26         | 6-phosphofructo-2-kinase                              |
| YKL103C         | APE1          | Aminopeptidase                                        |
| YKL133C         |               |                                                       |
| YFR017C         | IGD1          | Inhibitor of glycogen debranching                     |
| YDL085W         | NDE2          | NADH dehydrogenase, external                          |
| YDL110C         | TMA17         | Translation machinery associated                      |
| YGL121C         | GPG1          | G protein gamma                                       |
| YGL156W         | AMS1          | Alpha-mannosidase                                     |
| YGR070W         | ROM1          | Rho1 multicopy suppressor                             |
| YJL141C         | YAK1          | However, another kinase                               |
| YJL142C         | IRC9          | Increased recombination centers                       |
| YJL163C         |               |                                                       |
| YJL199C         | MBB1          |                                                       |
| YLL026W         | HSP104        | Heat shock protein                                    |
| YLR178C         | TFS1          | <i>cdc25</i> suppressor                               |
| YLR270W         | DCS1          | Decapping scavenger                                   |
| YLR356W         | ATG33         | Autophagy related                                     |
| YLR400W         |               |                                                       |
| YMR174C         | PAI3          | Proteinase A inhibitor                                |
| YMR175W         | SIP18         | Salt induced protein                                  |
| YMR196W         |               |                                                       |
| YNL115C         |               |                                                       |
| YNL200C         |               |                                                       |
| YOL083W         | ATG34         | Autophagy related                                     |
| YOR289W         |               |                                                       |
| YPL123C         | RNY1          | Ribonuclease from yeast                               |
| YPL230W         | USV1          | Up in starvation                                      |
| YPR151C         | SUE1          |                                                       |
| Block II        |               |                                                       |
| YAL017W         | PSK1          | Pas domain-containing serine/threonine protein kinase |
| YAL061W         | BDH2          |                                                       |
| YBR001C         | NTH2          | Neutral trehalase                                     |
| YBR026C         | ETR1          | 2-enoyl thioester reductase                           |
| YBR046C         | ZTA1          | Zeta-crystallin                                       |
| YBR067C         | TIP1          | Temperature shock-inducible protein                   |
| YBR105C         | VID24         | Vacuolar import and degradation                       |
| YBR132C         | AGP2          | High-affinity glutamine permease                      |
| YBR149W         | ARA1          | D-Arabinose dehydrogenase                             |
| YCL042W         |               |                                                       |
| YCR004C         | YCP4          |                                                       |
| YCR011C         | ADP1          | ATP-dependent permease                                |
| YCR091W         | KIN82         | protein kinase                                        |
| YEL011W         | GLC3          | Glycogen                                              |
| YEL060C         | PRB1          | Proteinase B                                          |
| YER079W         |               |                                                       |
| YER098W         | UBP9          | Ubiquitin-specific protease                           |
| YER141W         | COX15         | Cytochrome c oxidase                                  |
| YHL021C         | AIM17         | Altered inheritance rate of mitochondria              |
| YHR008C         | SOD2          | Superoxide dismutase                                  |
| YHR054C         |               |                                                       |
| YHR080C         |               |                                                       |
| YHR096C         | HXT5          | Hexose transporter                                    |
| YIL055C         |               |                                                       |
| YIL136W         | OM45          | Outer membrane 45 protein                             |
| YIL155C         | GUT2          | Glycerol utilization 2 protein                        |

Table S2. Cont.

| Systematic name | Standard name | Name                                       |
|-----------------|---------------|--------------------------------------------|
| YIL160C         | POT1          | Peroxisomal oxoacyl thiolase               |
| YIR019C         | FLO11         | Flocculation protein                       |
| YKL091C         |               |                                            |
| YKL093W         | MBR1          | Mitochondrial biogenesis regulation        |
| YKL142W         | MRP8          | Mitochondrial ribosomal protein            |
| YKL150W         | MCR1          | Mitochondrial NADH-cytochrome b5 reductase |
| YKL187C         | FAT3          | Fatty acid transporter 3                   |
| YKR039W         | GAP1          | General amino acid permease                |
| YFL036W         | RPO41         | RNA polymerase                             |
| YDL049C         | KNH1          | Kre9 (nine) homolog                        |
| YDL169C         | UGX2          | Unidentified gene X2                       |
| YDL181W         | INH1          | Inhibitor ATPase                           |
| YDL199C         |               |                                            |
| YDR032C         | PST2          | Protoplasts-secreted                       |
| YDR096W         | GIS1          | Glg1-2 suppressor                          |
| YDR100W         | TVP15         | Tlg2-vesicle protein                       |
| YDR133C         |               |                                            |
| YDR216W         | ADR1          | Alcohol dehydrogenase regulator            |
| YDR231C         | COX20         | Cytochrome c oxidase                       |
| YDR343C         | HXT6          | Hexose transporter                         |
| YDR504C         | SPG3          | Stationary phase gene                      |
| YDR505C         | PSP1          | Polymerase suppressor                      |
| YGL006W         | PMC1          | Plasma membrane calcium                    |
| YGL037C         | PNC1          | Pyrazinamidase and nicotinamidase          |
| YGL205W         | POX1          |                                            |
| YGL227W         | VID30         | Vacuolar import and degradation            |
| YGR008C         | STF2          | Stabilizing factor                         |
| YGR023W         | MTL1          | Mid-two like 1                             |
| YGR110W         | CLD1          | Cardiolipin-specific deacylase             |
| YGR130C         |               |                                            |
| YGR174C         | CBP4          | Cytochrome B mRNA processing               |
| YGR192C         | TDH3          | Triose-phosphate dehydrogenase             |
| YGR249W         | MGA1          |                                            |
| YGR279C         | SCW4          | Soluble cell wall protein                  |
| YJL048C         | UBX6          | Ubiquitin regulatory X                     |
| YJL066C         | MPM1          | Mitochondrial peculiar membrane protein    |
| YJL079C         | PRY1          | Pathogen related in yeast                  |
| YJL088W         | ARG3          | Arginine requiring                         |
| YJL164C         | TPK1          | Takashi's protein kinase                   |
| YJL185C         | ATG36         | Autophagy related                          |
| YJR008W         | MHO1          | Memo homolog                               |
| YLL019C         | KNS1          | Kinase next to SPA2                        |
| YLL020C         |               |                                            |
| YLR042C         |               |                                            |
| YLR120C         | YPS1          | Yapsin                                     |
| YLR149C         |               |                                            |
| YLR258W         | GSY2          | Glycogen synthase                          |
| YLR345W         |               |                                            |
| YLR375W         | STP3          | Protein with similarity to Stp1p           |
| YML054C         | CYB2          | Cytochrome B                               |
| YML128C         | MSC1          | Meiotic sister-chromatid recombination     |
| YMR031C         | EIS1          | Eisosome                                   |
| YMR105C         | PGM2          | Phosphoglucomutase                         |
| YMR107W         | SPG4          | Stationary-phase gene                      |
| YMR136W         | GAT2          |                                            |
| YMR145C         | NDE1          | NADH dehydrogenase, external               |
| YMR173W         | DDR48         | DNA damage responsive                      |
| YMR199W         | CLN1          | Cyclin 1                                   |
| YMR251W-A       | HOR7          | Hyperosmolarity-responsive                 |
| YMR297W         | PRC1          | Proteinase C                               |
| YNL015W         | PBI2          | Proteinase B inhibitor                     |
| YNL031C         | HHT2          | Histone H three                            |

**Table S2. Cont.**

| Systematic name | Standard name | Name                                         |
|-----------------|---------------|----------------------------------------------|
| YNL055C         | POR1          | Porin                                        |
| YNL100W         | AIM37         | Altered inheritance rate of mitochondria     |
| YNL180C         | RHO5          | Ras homolog                                  |
| YNL194C         |               |                                              |
| YNL195C         |               |                                              |
| YNL237W         | YTP1          | Yeast putative transmembrane protein         |
| YNL274C         | GOR1          | Glyoxylate reductase                         |
| YNL289W         | PCL1          | Pho85 cyclin                                 |
| YNL305C         | BX11          | Bax inhibitor                                |
| YOL011W         | PLB3          | Phospholipase B                              |
| YOL058W         | ARG1          | Arginine requiring                           |
| YOL081W         | IRA2          | Inhibitory regulator of the RAS-cAMP pathway |
| YOL084W         | PHM7          | Phosphate metabolism                         |
| YOR173W         | DCS2          | Decapping scavenger                          |
| YOR178C         | GAC1          | Glycogen accumulation                        |
| YOR215C         | AIM41         | Altered inheritance of mitochondria          |
| YOR302W         |               |                                              |
| YOR317W         | FAA1          | Fatty acid activation                        |
| YOR348C         | PUT4          | Proline utilization                          |
| YOR374W         | ALD4          | Aldehyde dehydrogenase                       |
| YPL004C         | LSP1          | Long chain bases stimulate phosphorylation   |
| YPL024W         | RMI1          | RecQ mediated genome instability             |
| YPL026C         | SKS1          | Suppressor kinase of SNF3                    |
| YPL087W         | YDC1          | Yeast dihydroceramidase                      |
| YPL154C         | PEP4          | Carboxypeptidase Y-deficient                 |
| YPL186C         | UIP4          | Ulp1 interacting protein                     |
| YPL222W         | FMP40         | Found in mitochondrial proteome              |
| YPR026W         | ATH1          | Acid trehalase                               |
| YPR065W         | ROX1          | Regulation by oxygen                         |
| YPR098C         |               |                                              |
| YPR149W         | NCE102        | Nonclassical export                          |
| YPR184W         | GDB1          |                                              |
| YDL130W-A       | STF1          | Stabilizing factor                           |
| YGR161C-D       |               |                                              |
| YDR261W-B       |               |                                              |
| YBR085C-A       |               |                                              |
| YNR034W-A       |               |                                              |

cdk8Δ vs. WT,  $P \leq 0.05$ .

**Table S3. Yeast strains used in this study**

| Strain                                 | Relevant genotype                                                                                                                                       | Reference     |
|----------------------------------------|---------------------------------------------------------------------------------------------------------------------------------------------------------|---------------|
| FT5                                    | <i>MAT<math>\alpha</math>; ura3-52; trp1<math>\Delta</math>65; his3<math>\Delta</math>200; leu2::PET56</i>                                              | (1)           |
| L9FT5                                  | <i>MAT<math>\alpha</math>; ura3-52; trp1<math>\Delta</math>65; his3<math>\Delta</math>200; leu2::PET56; 4XLexA Operator-TATA-His3</i>                   | (2)           |
| Z718                                   | <i>MAT<math>\alpha</math>; ura3-52; his3<math>\Delta</math>200; leu2-3</i>                                                                              | (3)           |
| Cdk8 $\Delta$                          | <i>MAT<math>\alpha</math>; ura3-52; his3<math>\Delta</math>200; leu2-3</i>                                                                              | (3)           |
| Cdk8 $\Delta$ med3 $\Delta$ HIS3       | <i>MAT<math>\alpha</math>; ura3-52; leu2-3</i>                                                                                                          | This study    |
| Cdk8 $\Delta$ med2 $\Delta$ HIS3       | <i>MAT<math>\alpha</math>; ura3-52; leu2-3</i>                                                                                                          | This study    |
| Cdk8 $\Delta$ spt8 $\Delta$ KanR       | <i>MAT<math>\alpha</math>; ura3-52; his3<math>\Delta</math>200; leu2-3; YLR055c::kanMX4</i>                                                             | This study    |
| Cdk8 $\Delta$ D290A                    | <i>MAT<math>\alpha</math>; ura3-52; his3<math>\Delta</math>200; leu2-3</i>                                                                              | (3)           |
| Cdk8 $\Delta$ D290A med3 $\Delta$ HIS3 | <i>MAT<math>\alpha</math>; ura3-52; leu2-3</i>                                                                                                          | This study    |
| med3 $\Delta$ HIS3                     | <i>MAT<math>\alpha</math>; ura3-52; leu2-3</i>                                                                                                          | This study    |
| med2 $\Delta$ HIS3                     | <i>MAT<math>\alpha</math>; ura3-52; leu2-3</i>                                                                                                          | This study    |
| spt8 $\Delta$ KanR                     | <i>MAT<math>\alpha</math>; ura3-52; his3<math>\Delta</math>200; leu2-3; YLR055c::kanMX4</i>                                                             | This study    |
| JN 284 (Ise1)                          | <i>MAT<math>\alpha</math> his7 leu2 ura3 ise1</i>                                                                                                       | (4)           |
| BY4741                                 | <i>MAT<math>\alpha</math>; his3<math>\Delta</math>1; leu2<math>\Delta</math>0; met15<math>\Delta</math>0; ura3<math>\Delta</math>0</i>                  | EUROSCARF (5) |
| grr1 $\Delta$                          | <i>MAT<math>\alpha</math>; his3<math>\Delta</math>1; leu2<math>\Delta</math>0; met15<math>\Delta</math>0; ura3<math>\Delta</math>0; YJR090c::kanMX4</i> | EUROSCARF (5) |
| Med3-TAP                               | <i>MAT<math>\alpha</math> ade2 arg4 leu2-3,112 trp1-289 ura3-52</i>                                                                                     | EUROSCARF (6) |
| Med3 -TAPgrr1 $\Delta$                 | TAP-tagged strain <i>MED3 grr1<math>\Delta</math></i>                                                                                                   | This study    |
| Med15-TAP                              | YPH499, YDL005c:TAP-K.I.TRP1                                                                                                                            | This study    |
| Med15-TAP cdk8 $\Delta$                | YPH499, YDL005c:TAP-K.I.TRP1                                                                                                                            | This study    |
| YC7                                    | <i>MAT a his3<math>\Delta</math>200 leu2-3,112 ura3-52 srb10-3<sup>myc9</sup>::hisG</i>                                                                 | (7)           |
| YC17                                   | <i>MAT a his3<math>\Delta</math>200 leu2-3,112 ura3-52 SRB10<sup>myc9</sup></i>                                                                         | (7)           |

1. Tzamarias D, Struhl K (1994) Functional dissection of the yeast Cyc8-Tup1 transcriptional co-repressor complex. *Nature* 369(6483):758–761.
2. Tzamarias D, Struhl K (1995) Distinct TPR motifs of Cyc8 are involved in recruiting the Cyc8-Tup1 corepressor complex to differentially regulated promoters. *Genes Dev* 9(7):821–831.
3. Liao SM, et al. (1995) A kinase-cyclin pair in the RNA polymerase II holoenzyme. *Nature* 374(6518):193–196.
4. Lee DH, Goldberg AL (1996) Selective inhibitors of the proteasome-dependent and vacuolar pathways of protein degradation in *Saccharomyces cerevisiae*. *J Biol Chem* 271(44):27280–27284.
5. Brachmann CB, et al. (1998) Designer deletion strains derived from *Saccharomyces cerevisiae* S288C: A useful set of strains and plasmids for PCR-mediated gene disruption and other applications. *Yeast* 14(2):115–132.
6. Gavin AC, et al. (2006) Proteome survey reveals modularity of the yeast cell machinery. *Nature* 440(7084):631–636.
7. Chi Y, et al. (2001) Negative regulation of Gcn4 and Msn2 transcription factors by Srb10 cyclin-dependent kinase. *Genes Dev* 15(9):1078–1092.

**Table S4. Plasmids used in this study**

| Plasmid               | Relevant characteristics                                           | Source     |
|-----------------------|--------------------------------------------------------------------|------------|
| e2p6-HRS1             | 2- $\mu$ m plasmid, MED3 over-expressed, ADH1 promoter             | (1)        |
| e2p6-HRS1T195A        | 2- $\mu$ m plasmid, MED3T195A over-expressed, ADH1 promoter        | This study |
| e2p6-HRS1S191G        | 2- $\mu$ m plasmid, MED3S191G over-expressed, ADH1 promoter        | This study |
| e2p6-MED2             | 2- $\mu$ m plasmid, MED2 over-expressed, ADH1 promoter             | (1)        |
| pGIG2                 | 2- $\mu$ m plasmid, CDK8 over-expressed, Own promoter intact       | (2)        |
| pGIG2-3               | 2- $\mu$ m plasmid, CDK8D290A over-expression, Own promoter intact | This study |
| pRS403                | Yeast Integrating plasmid, ampicillin resistance, HIS3 selection   | (3)        |
| pRS405                | Yeast Integrating plasmid, ampicillin resistance, LEU2 selection   | (3)        |
| BM2961                | 2- $\mu$ m plasmid, LexA-grr1                                      | (4)        |
| pRSTMED3              | (6xHis) tagMED3, inducible T7 promoter                             | (1)        |
| pRSTMED3 $\Delta$ Sal | (6xHis) tagMED3 $\Delta$ Sal, inducible T7 promoter                | This study |
| pRW0123081            | pAS2-GRR1                                                          | (5)        |
| pRW040981             | pAS2-GRR1 $\Delta$ L                                               | (5)        |
| pRW0411081            | pAS2-GRR1 $\Delta$ F                                               | (5)        |
| BM3383                | pT7-Grr1 $\Delta$ N                                                | (4)        |

1. Papamichos-Chronakis M, Conlan RS, Gounalaki N, Copf T, Tzamarias D (2000) Hrs1/Med3 is a Cyc8-Tup1 corepressor target in the RNA polymerase II holoenzyme. *J Biol Chem* 275(12):8397–8403.
2. Balciunas D, Ronne H (1995) Three subunits of the RNA polymerase II mediator complex are involved in glucose repression. *Nucleic Acids Res* 23(21):4421–4425.
3. Sikorski RS, Hieter P (1989) A system of shuttle vectors and yeast host strains designed for efficient manipulation of DNA in *Saccharomyces cerevisiae*. *Genetics* 122(1):19–27.
4. Li FN, Johnston M (1997) Grr1 of *Saccharomyces cerevisiae* is connected to the ubiquitin proteolysis machinery through Skp1: Coupling glucose sensing to gene expression and the cell cycle. *EMBO J* 16(18):5629–5638.
5. Wang R, Solomon MJ (2012) Identification of She3 as an SCF(Grr1) substrate in budding yeast. *PLoS ONE* 7(10):e48020.

**Table S5. Primers used in this study**

| Primers      | Sequence 5' to 3'                                                      |
|--------------|------------------------------------------------------------------------|
| ACT1-ORF-f   | TCCCAGGTATTGCCGAAAGAATG                                                |
| ACT1-ORF-r   | AGCCAAGATAGAACCACCAATCC                                                |
| FLO11-ORF-f  | GTATGCTCTGCTAAGACTATCG                                                 |
| FLO11-ORF-r  | GCCAGCGGAGTTAGTACC                                                     |
| FLO11-HSL-f  | AAAGCAACTATTAGGGTACGATTG                                               |
| FLO11-HSL-r  | AAAAGAACGAAGTATATTGCGATG                                               |
| FLO11-TATA-f | ACGGATAACTCATAGACTTACCAG                                               |
| FLO11-TATA-r | CACAACATGACGAGGGATAATAAC                                               |
| GIG2mut-f    | CCATAGATGGATGTGTTAAATTTGGTGCTTTAGGTTTGCCAG                             |
| GIG2mut-r    | CTGGCCAAACCTAAAGCACCAATTTAACACATCCATCTATGG                             |
| MED2HIS3-f   | CGGATCCTCCCAAATAAACTGCCCGTCTGAAAAGTA GGAGTCACTGCCAGGTATCG              |
| MED2HIS3-r   | TTTACAAGTCAATAGTTAACAATAGGAAGACCAAG CGCCTCGTTCAGAATGACAC               |
| SRB10HIS3-f  | TTAAGGCCCGCTAGTTTGGACGGGAGGAGAGAGAAGGAGTCACTGCCAGGTATCG                |
| SRB10HIS3-r  | CTATCTTCTGTTTTTCTTTCGAGATGGCTCATCTGCGCCTCGTTCAGAATGACAC                |
| GRR1LEU-f    | GCCGCCTAGT TTTGACGGGA GGAGAGAGAA CTGTGCGGTATTCACACCG                   |
| GRR1LEU-r    | GCTGTGGAAT GAAAAATTCC AAATATATAT AAAAAATAGAA GCC AGATTGTTACTGAGAGTGCAC |
| SPT8HIS3-f   | CGTAATGGACGAGGTTGACGATATTCTAATTAACAGGAGTCACTGCCAGGTATCG                |
| SPT8HIS3-r   | GTCTATATCGTAAATAAGGGTCGTGCCGTAGAATCGCCTCGTTCAGAATGACAC                 |

**Dataset S1. Peak lists generated from raw MS data and subsequent database search results from peak lists input**

[Dataset S1](#)
